# Supplementary material for: Case report: Wallerian degeneration: The innate-immune response to adult-onset Still's disease peripheral nerve injury
Source: Frontiers journal article supplement (doi:10.3389/fneur.2022.1016393), 2022-10-19
Supplement: Data_Sheet_2.pdf [file Data_Sheet_2.pdf]

| Recording Site         |      | Latency      |               |
|------------------------|------|--------------|---------------|
|                        |      | Left(ms)     | Right(ms)     |
| Erb's                  | N9   | 9.0          | 10.9          |
|                        | N9'  | 6.8          | 9.2           |
| C4'-Fz/C3'-Fz          | P14  | 19.4         | NE            |
|                        | N20  | 22.7         | NE            |
|                        | P25  | 30.6         | 33.3          |
|                        | N35  | 38.1         | 38.4          |
|                        | P45  | 53.3         | 48.4          |
|                        | P14' | 18.0         |               |
|                        | N70  | 65.8         | 59.0          |
| Amplitude              |      | Left<br>(μV) | Right<br>(μV) |
| Erb's:N9- Erb's:N9'    |      | 5.6          | 2.7           |
| C4'-Fz:P14-C4'-Fz:P14' |      | 0.26         | NE            |
| C4'-Fz:N20-C4'-Fz:P14  |      | 0.29         | NE            |
| C4'-Fz:P25-C4'-Fz:N20  |      | 0.47         | NE            |
| C3'-Fz:N35-C3'-Fz:P25  |      | 0.68         | 2.9           |
| C3'-Fz:P45-C3'-Fz:N35  |      | 1.45         | 2.0           |
| C3'-Fz:N70-C3'-Fz:P45  |      | 1.46         | 5.5           |

SEP 2 low 2ch

| Recording Site         |      | Latency      |               |
|------------------------|------|--------------|---------------|
|                        |      | Left(ms)     | Right(ms)     |
| Popliteal(PF)          | N9   | 10.1         | 9.7           |
|                        | N9'  | 9.1          | 8.6           |
| C4'-Fz/C3'-Fz          | P30  | 43.9         | NE            |
|                        | P38  | 53.0         | NE            |
|                        | P60  | 66.8         | NE            |
|                        | P30' | 42.0         | NE            |
|                        | P38' | 46.6         | NE            |
|                        | P60' | 60.6         | NE            |
| Amplitude              |      | Left<br>(μV) | Right<br>(μV) |
| PF:N9- PF:N9'          |      | 0.20         | 1.00          |
| C4'-Fz:P30-C4'-Fz:P30' |      | 0.60         | NE            |
| C4'-Fz:P38-C4'-Fz:P38' |      | 1.30         | NE            |
| C4'-Fz:P60-C4'-Fz:P60' |      | 0.20         | NE            |

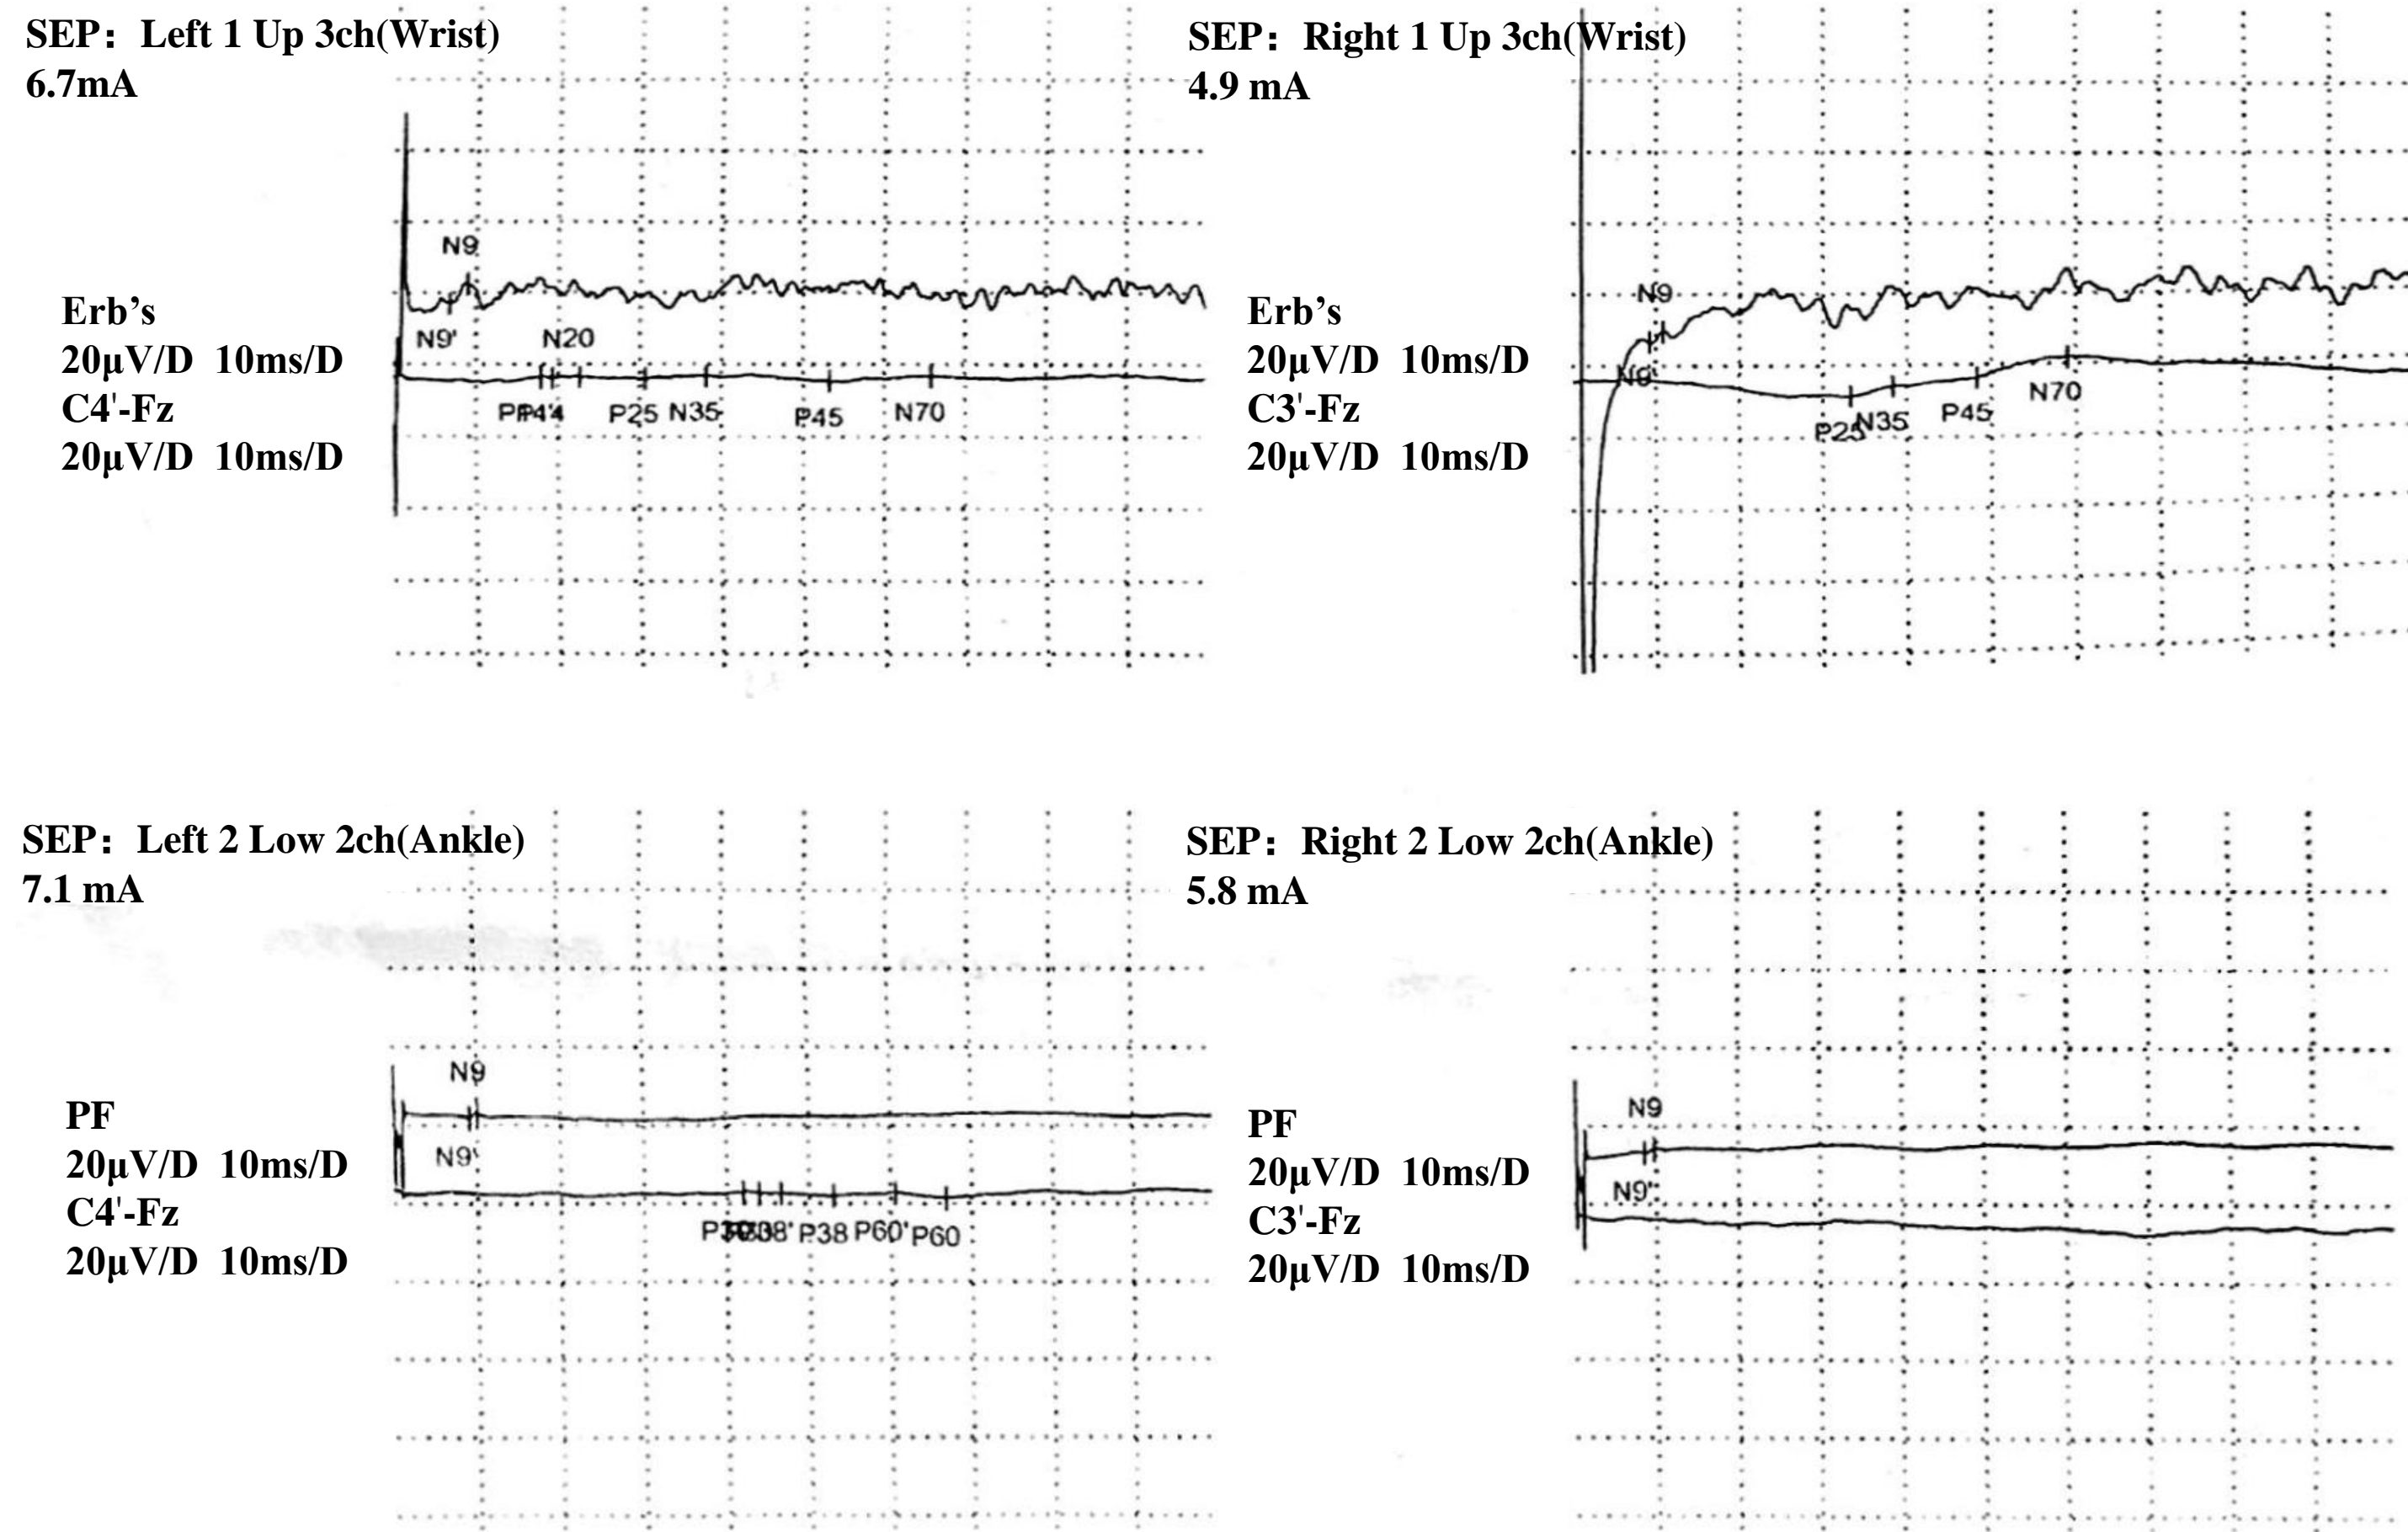

**Supplementary Figure 2.** Somatosensory evoked potentials(SEP) suggest sensory neuropathy/ganglionopathy.

Bilateral median nerve stimulation, Erb's point, left and right central recording, somatosensory evoked potential: right median nerve stimulation P14, N20 was not evoked, and the rest were normal. Left median nerve stimulation P14, N20 latency was prolonged, and the rest were normal. Bilateral posterior tibial nerve stimulation, popliteal fossa, left and right central recordings, and somatosensory evoked potentials: P30 and P38 were not evoked by right posterior tibial nerve stimulation, and the N9 latency was normal. Left posterior tibial nerve stimulation P30, P38 latency was prolonged, N9 latency normal. NE: not evoked.
